# Supplementary material
Source: PubMed Central journal article supplement (PMC3276591)
Supplement: NIHMS1970-supplement-Supplementary_Material.pdf [file NIHMS1970-supplement-Supplementary_Material.pdf]

Supporting information for:

# Specific uptake and imaging of bombesin functionalized iron oxide nanoparticles in prostate cancer cells

Amanda L. Martin<sup>†</sup>, Jennifer L. Hickey<sup>†</sup>, Amber L. Ablack<sup>§</sup>, John D. Lewis<sup>¶</sup>, Leonard G.

Luyt<sup>†§±</sup>, and Elizabeth R. Gillies<sup>†‡\*</sup>

<sup>†</sup>Department of Chemistry, <sup>‡</sup>Department of Chemical and Biochemical Engineering, <sup>§</sup>Department of Oncology, <sup>±</sup>Department of Medical Imaging, <sup>¶</sup>Department of Medical Biophysics, The University of Western Ontario, 1151 Richmond St., London, ON N6A 5B7.

Table of Contents:

|                                                         |       |
|---------------------------------------------------------|-------|
| 1. HPLC of peptide <b>1</b> .....                       | pg. 2 |
| 2. ESI-MS of peptide <b>1</b> .....                     | pg. 2 |
| 3. UV-visible spectrum of nanoparticle <b>4</b> .....   | pg. 3 |
| 4. Fluorescence spectrum of nanoparticle <b>4</b> ..... | pg. 3 |

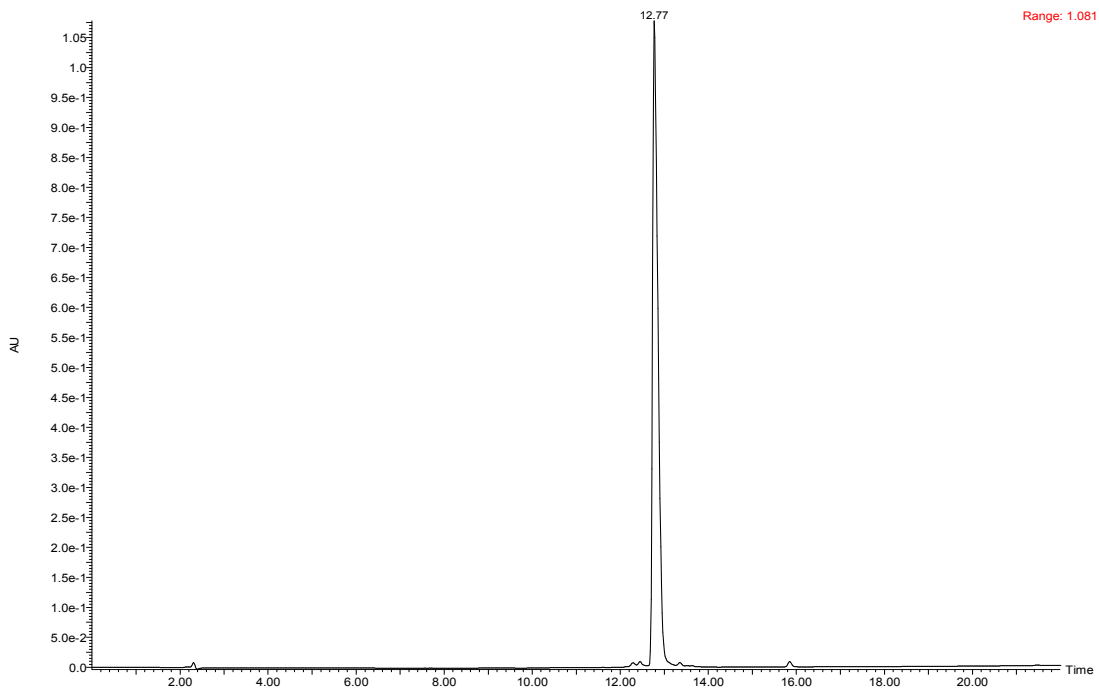

**Figure S1.** HPLC of peptide **1**. Linear gradient of 20-80% solvent A in B. Purity of peptide determined to be 98.7%.

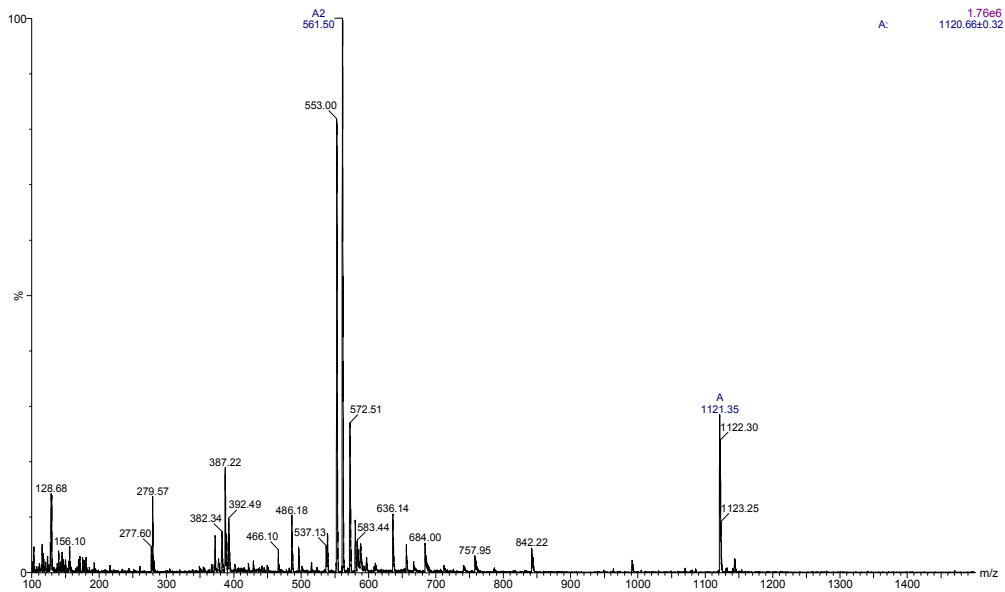

**Figure S2.** ESI-MS of peptide **1**. m/z calculated 1121.59, found 1121.35  $[M+H]^+$  and m/z calculated 561.30, found 561.50  $[M+2H]^{2+}$ .

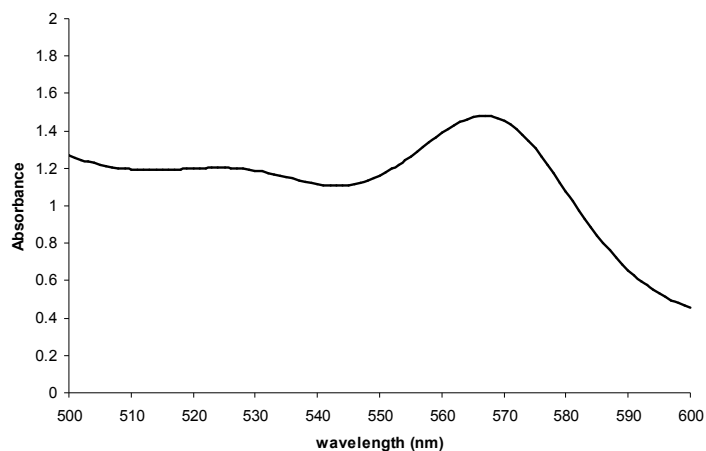

**Figure S3.** UV-visible spectrum of nanoparticle **4** ( $c = 0.14$  mg/mL of iron, path length ( $b$ ) = 1 cm,  $\epsilon$  for rhodamine dye =  $96000$   $\text{cm}^{-1}\text{M}^{-1}$  at 560 nm). The loading of dye can be determined by subtracting the absorbance of the iron oxide nanoparticles at 560 nm (determined from a calibration curve), then solving the expression  $A = \epsilon bc$  for the concentration of dye.

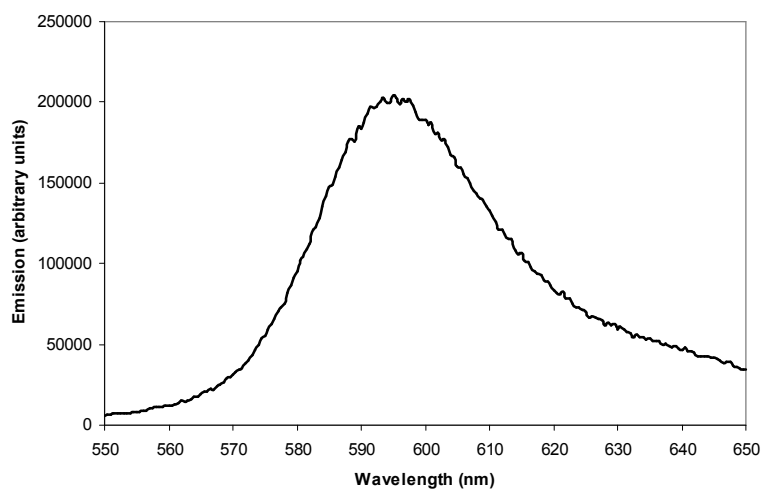

**Figure S4.** Fluorescence emission spectrum of nanoparticle **4** showing maximum emission at 595 nm. Lack of quenching by the iron oxide core was verified by comparison with a sample of the unconjugated dye having a normalized absorbance.
